# Supplementary material
Source: PubMed Central journal article supplement (PMC4997088)
Supplement: NIHMS803677-supplement-01.pdf [file NIHMS803677-supplement-01.pdf]

**Supplemental Table 1.** AIN-Based Diet Composition

| Component (g/Kg)           | CAS<br>(17% kcal fat) | HFD<br>(45% kcal fat) |
|----------------------------|-----------------------|-----------------------|
| Casein                     | 200.0                 | 210.0                 |
| L-Cystine                  | 3.0                   | 3.0                   |
| Corn starch                | 397.5                 | 160.0                 |
| Maltodextrin               | 132.0                 | 150.0                 |
| Sucrose                    | 100.0                 | 150.0                 |
| Corn oil                   | 70.0                  | 20.0                  |
| Cellulose                  | 50.0                  | 28.96                 |
| Mineral mix,<br>AIN-93G-MX | 10.0                  | 50.0                  |
| Vitamin mix,<br>AIN-93G-VX | 10.0                  | 15.0                  |
| Choline bitartrate         | 2.5                   | 3.0                   |
| TBHQ (antioxidant)         | 0.014                 | 0.04                  |
| Lard                       | -                     | 210.0                 |

AIN = American Institute of Nutrition
