# Supplementary material
Source: PubMed Central journal article supplement (PMC4997088)
Supplement: NIHMS803677-supplement-02.pdf [file NIHMS803677-supplement-02.pdf]

**Supplemental Table 2: List of Antibodies for FACS**

| Antibody                   | Vendor         | Catalog No. |
|----------------------------|----------------|-------------|
| PE Rat Anti-Mouse CD24     | BD Biosciences | 553262      |
| FITC Anti-Mouse/Rat CD29   | BD Biosciences | 553989      |
| Biotin Mouse Lineage Panel | BD Biosciences | 559971      |
| Biotin Rat Anti-Mouse CD31 | BD Biosciences | 553371      |
| APC Streptavidin           | BD Biosciences | 554067      |
| APC Cy7 Mouse Anti-Rat     | BD Biosciences | 561401      |
